# Supplementary material for: Effect of Problem-solving Treatment on Self-reported Disability Among Veterans With Gulf War Illness: A Randomized Clinical Trial
Source: PubMed Central journal article supplement (PMC9856484; doi:10.1001/jamanetworkopen.2022.45272), 2022-12-06
Supplement: jamanetwopen-e2245272-s002.pdf [file jamanetwopen-e2245272-s002.pdf]

## Data Sharing Statement

McAndrew. Effect of Problem-Solving Treatment on Self-reported Disability Among Veterans With Gulf War Illness. *JAMA Netw Open*. Published December 06, 2022.

doi:10.1001/jamanetworkopen.2022.45272

### Data

**Data available:** No

### Additional Information

**Explanation for why data not available:** Data will be made available upon request, when appropriate and consistent with informed consent and other participant permissions, and with permission from the Veterans Affairs.
